# Supplementary material for: Extraordinarily large kinetic isotope effect on alkene hydrogenation over Rh-based intermetallic compounds
Source: Sci Technol Adv Mater. 2019 Jul 11;20(1):805–12. doi: 10.1080/14686996.2019.1642139 (PMC6711132; doi:10.1080/14686996.2019.1642139)
Supplement: Supplemental Material [file TSTA_A_1642139_SM0345.docx]

**Supporting Information**

Extraordinarily large kinetic isotope effect on

alkene hydrogenation over

Rh-based intermetallic compounds

Shinya Furukawa, ,*,a,b Pingping Yi,b Yuji Kunisada,c

and Ken-ichi Shimizua,b

a *Institute for Catalysis, Hokkaido University, N-21, W-10, Sapporo 001-0021, Japan*

b *Elements Strategy Initiative for Catalysts and Batteries,*

*Kyoto University, Katsura, Kyoto 615-8520, Japan*

c *Center for Advanced Research of Energy and Materials, Faculty of Engineering,*

*Hokkaido University, Sapporo 060-8628, Japan*

*E-mail: furukawa@cat.hokudai.ac.jp,*

*Tel: +81-11-706-9162, Fax: +81-11-706-9163*

Table S1. Adsorption (*E*ad) and dissociation (*E*dis) energies of H2 on Rh-based surfaces.

|  | *E*ad (eV) | | *E*dis (eV) | |
| --- | --- | --- | --- | --- |
| H2 | D2 | H2 | D2 |
| Rh | −0.049 | −0.049 | 0.013 | 0.011 |
| RhIn | −0.028 | −0.029 | 0.076 | 0.074 |
| RhPb2 | −0.046 | −0.049 | 0 | 0 |


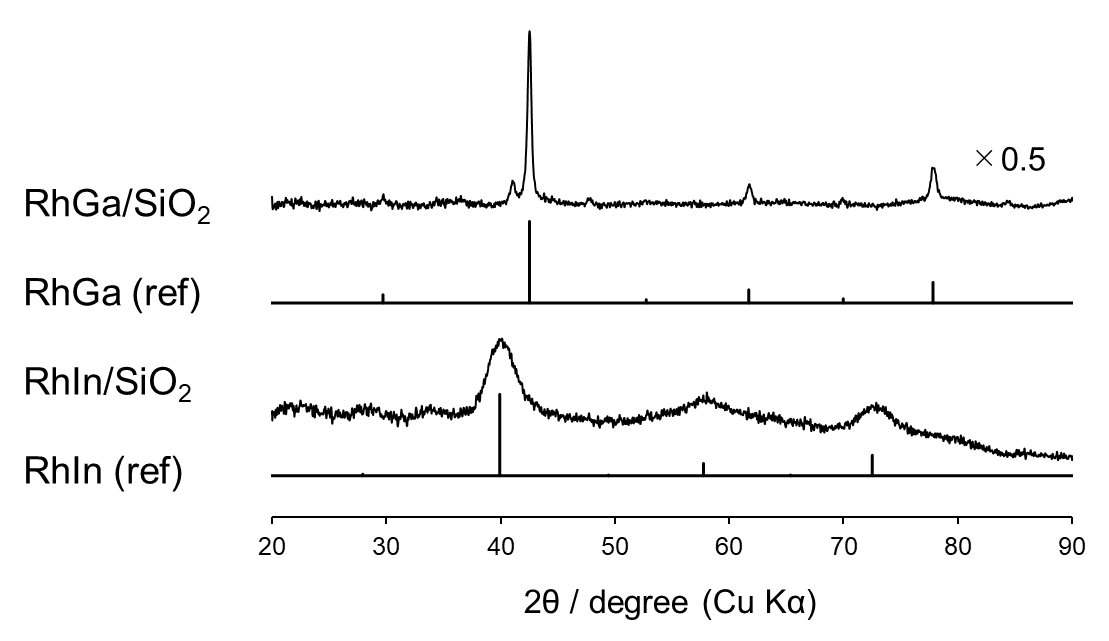


Figure S1. XRD patterns of RhGa/SiO2 and RhIn/SiO2. References are shown as black vertical lines. The desired intermetallic phases were observed with high phase purities.


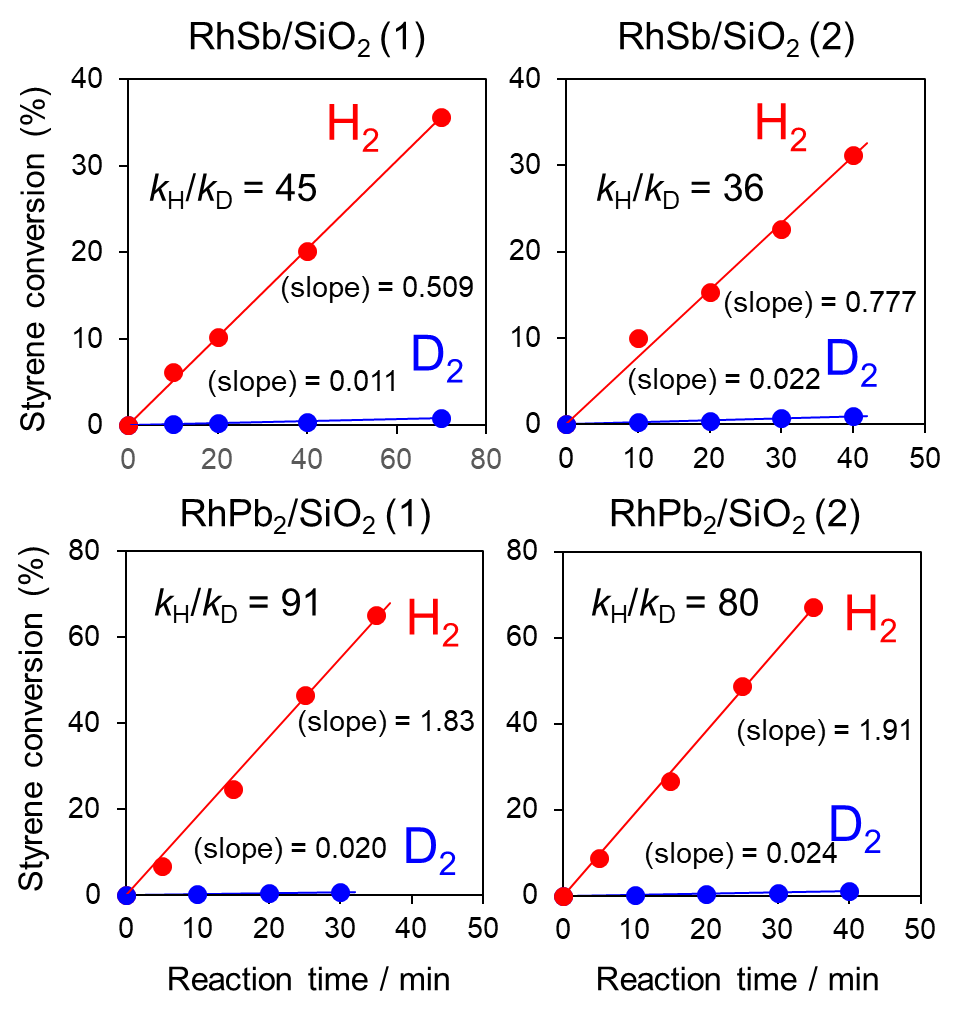


Figure S2. Time-course of styrene conversion in styrene hydrogenation over RhSb/SiO2 and RhPb2/SiO2 catalysts when H2 (red) or D2 (blue) was used as a hydrogen source.


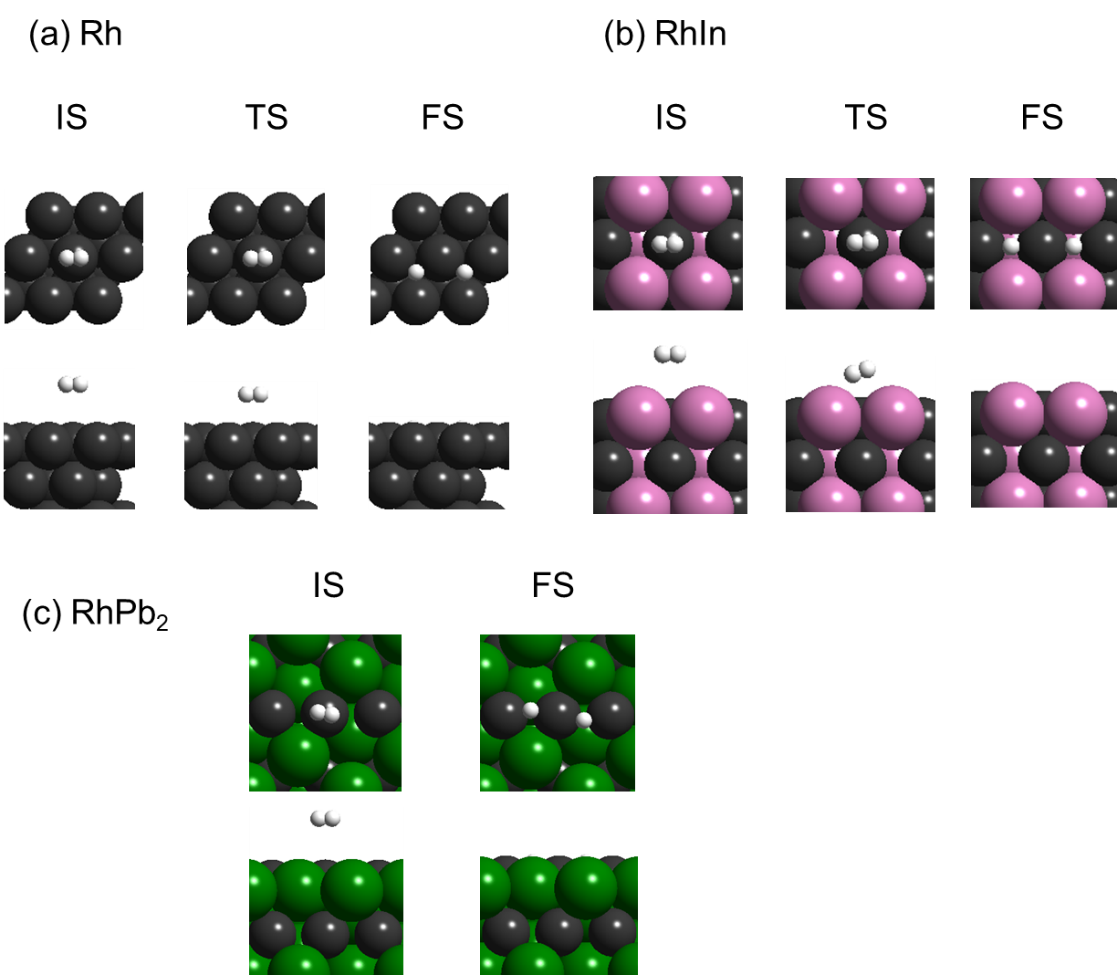


Figure S3. Structures of initial (IS: H2 molecule), transition (TS), and final (FS: two H atoms) states during H2 activation process over (a) Rh(111), (b) RhIn(110), and (c) RhPb2(100) surfaces.


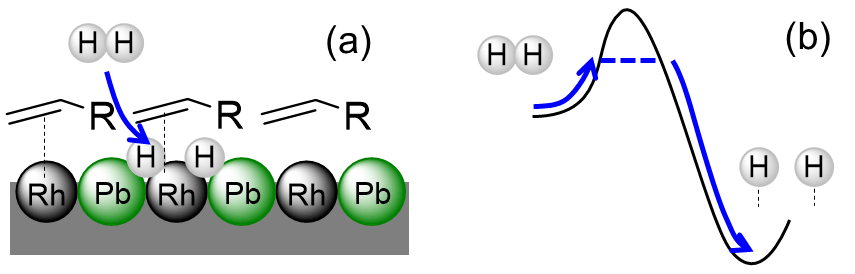


Figure S4. (a) Schematic illustration and (b) energy diagram of hydrogen dissociative adsorption on RhPb2 covered with alkene. The dotted line in (a) indicates adsorption of the C=C moiety on the Rh site.
